# Supplementary material
Source: publisher figshare collection journal article supplement (https://acs.figshare.com/ndownloader/files/4662160)
Supplement: Supplementary file 1 [file 4662160]

    

data_cheng2br 

  

_audit_creation_method            SHELXL-97 

_chemical_name_systematic 

; 

 ? 

; 

_chemical_name_common             ? 

_chemical_melting_point           ? 

_chemical_formula_moiety          ? 

_chemical_formula_sum        'C12 H14 Br2 N2' 

_chemical_formula_weight          346.07 

  

loop_ 

 _atom_type_symbol 

 _atom_type_description 

 _atom_type_scat_dispersion_real 

 _atom_type_scat_dispersion_imag 

 _atom_type_scat_source 

 'C'  'C'   0.0033   0.0016 

 'International Tables Vol C Tables 4.2.6.8 and 6.1.1.4' 

 'H'  'H'   0.0000   0.0000 

 'International Tables Vol C Tables 4.2.6.8 and 6.1.1.4' 

 'N'  'N'   0.0061   0.0033 

 'International Tables Vol C Tables 4.2.6.8 and 6.1.1.4' 

 'Br'  'Br'  -0.2901   2.4595 

 'International Tables Vol C Tables 4.2.6.8 and 6.1.1.4' 

  

_symmetry_cell_setting            Monoclinic 

_symmetry_space_group_name_H-M    P2(1)/n 

  

loop_ 

 _symmetry_equiv_pos_as_xyz 

 'x, y, z' 

 '-x+1/2, y+1/2, -z+1/2' 

 '-x, -y, -z' 

 'x-1/2, -y-1/2, z-1/2' 

  

_cell_length_a                    18.333(2) 

_cell_length_b                    7.6856(10) 

_cell_length_c                    18.386(2) 

_cell_angle_alpha                 90.00 

_cell_angle_beta                  108.073(2) 

_cell_angle_gamma                 90.00 

_cell_volume                      2462.8(6) 

_cell_formula_units_Z             8 

_cell_measurement_temperature     100(2) 

_cell_measurement_reflns_used     7369 

_cell_measurement_theta_min       2.26 

_cell_measurement_theta_max       30.50 

  

_exptl_crystal_description        needle 

_exptl_crystal_colour             colourless 

_exptl_crystal_size_max           0.45 

_exptl_crystal_size_mid           0.13 

_exptl_crystal_size_min           0.11 

_exptl_crystal_density_meas       ?

_exptl_crystal_density_diffrn     1.867 

_exptl_crystal_density_method     'not measured' 

_exptl_crystal_F_000              1360 

_exptl_absorpt_coefficient_mu     6.557 

_exptl_absorpt_correction_type    numerical

_exptl_absorpt_correction_T_min   0.156

_exptl_absorpt_correction_T_max   0.532

_exptl_absorpt_process_details    'Bruker SAINT'

  

_exptl_special_details 

; 

 ? 

; 

  

_diffrn_ambient_temperature       100(2) 

_diffrn_radiation_wavelength      0.71073 

_diffrn_radiation_type            MoK\a 

_diffrn_radiation_source          'fine-focus sealed tube' 

_diffrn_radiation_monochromator   graphite 

_diffrn_measurement_device_type   'CCD area detector' 

_diffrn_measurement_method        'phi and omega scans' 

_diffrn_detector_area_resol_mean  ? 

_diffrn_standards_number          ? 

_diffrn_standards_interval_count  ? 

_diffrn_standards_interval_time   ? 

_diffrn_standards_decay_%         ? 

_diffrn_reflns_number             30071 

_diffrn_reflns_av_R_equivalents   0.0380 

_diffrn_reflns_av_sigmaI/netI     0.0378 

_diffrn_reflns_limit_h_min        -25 

_diffrn_reflns_limit_h_max        26 

_diffrn_reflns_limit_k_min        -10 

_diffrn_reflns_limit_k_max        10 

_diffrn_reflns_limit_l_min        -26 

_diffrn_reflns_limit_l_max        25 

_diffrn_reflns_theta_min          1.89 

_diffrn_reflns_theta_max          30.56 

_reflns_number_total              7464 

_reflns_number_gt                 6311 

_reflns_threshold_expression      >2sigma(I) 

  

_computing_data_collection        'Bruker SMART' 

_computing_cell_refinement        'Bruker SMART' 

_computing_data_reduction         'Bruker SAINT' 

_computing_structure_solution     'SHELXS-97 (Sheldrick, 1990)' 

_computing_structure_refinement   'SHELXL-97 (Sheldrick, 1997)' 

_computing_molecular_graphics     'Bruker SHELXTL' 

_computing_publication_material   'Bruker SHELXTL' 

  

_refine_special_details 

; 

 Refinement of F^2^ against ALL reflections.  The weighted R-factor wR and 

 goodness of fit S are based on F^2^, conventional R-factors R are based 

 on F, with F set to zero for negative F^2^. The threshold expression of 

 F^2^ > 2sigma(F^2^) is used only for calculating R-factors(gt) etc. and is 

 not relevant to the choice of reflections for refinement.  R-factors based 

 on F^2^ are statistically about twice as large as those based on F, and R- 

 factors based on ALL data will be even larger. 

; 

  

_refine_ls_structure_factor_coef  Fsqd 

_refine_ls_matrix_type            full 

_refine_ls_weighting_scheme       calc 

_refine_ls_weighting_details 

 'calc w=1/[\s^2^(Fo^2^)+(0.0290P)^2^+4.0000P] where P=(Fo^2^+2Fc^2^)/3' 

_atom_sites_solution_primary      direct 

_atom_sites_solution_secondary    difmap 

_atom_sites_solution_hydrogens    geom 

_refine_ls_hydrogen_treatment     mixed 

_refine_ls_extinction_method      none 

_refine_ls_extinction_coef        ? 

_refine_ls_number_reflns          7464 

_refine_ls_number_parameters      395 

_refine_ls_number_restraints      90 

_refine_ls_R_factor_all           0.0405 

_refine_ls_R_factor_gt            0.0317 

_refine_ls_wR_factor_ref          0.0773 

_refine_ls_wR_factor_gt           0.0745 

_refine_ls_goodness_of_fit_ref    1.007 

_refine_ls_restrained_S_all       1.001 

_refine_ls_shift/su_max           0.001 

_refine_ls_shift/su_mean          0.000 

  

loop_ 

 _atom_site_label 

 _atom_site_type_symbol 

 _atom_site_fract_x 

 _atom_site_fract_y 

 _atom_site_fract_z 

 _atom_site_U_iso_or_equiv 

 _atom_site_adp_type 

 _atom_site_occupancy 

 _atom_site_symmetry_multiplicity 

 _atom_site_calc_flag 

 _atom_site_refinement_flags 

 _atom_site_disorder_assembly 

 _atom_site_disorder_group 

Br1 Br 0.53106(2) 0.48540(4) 0.22396(2) 0.02312(8) Uani 0.9472(10) 1 d PD A 1 

Br2 Br 0.40511(4) 0.7559(2) -0.07518(3) 0.01898(12) Uani 0.9472(10) 1 d PD A 1 

N1 N 0.25965(13) 0.7888(3) -0.02399(14) 0.0154(4) Uani 0.9472(10) 1 d PD A 1 

H1N H 0.265(2) 0.864(4) -0.0554(17) 0.023 Uiso 0.9472(10) 1 d PD A 1 

N2 N 0.17527(13) 0.6827(3) 0.04162(13) 0.0149(4) Uani 0.9472(10) 1 d PD A 1 

C1 C 0.44710(16) 0.5809(4) 0.14616(16) 0.0173(5) Uani 0.9472(10) 1 d PD A 1 

C2 C 0.45681(16) 0.6330(4) 0.07789(16) 0.0168(5) Uani 0.9472(10) 1 d PD A 1 

H2 H 0.5052 0.6222 0.0695 0.020 Uiso 0.9472(10) 1 calc PR A 1 

C3 C 0.39407(16) 0.7017(3) 0.02171(15) 0.0149(5) Uani 0.9472(10) 1 d PD A 1 

C4 C 0.32217(15) 0.7242(3) 0.03250(15) 0.0139(5) Uani 0.9472(10) 1 d PD A 1 

C5 C 0.31444(15) 0.6668(3) 0.10242(15) 0.0143(5) Uani 0.9472(10) 1 d PD A 1 

C6 C 0.37619(16) 0.5952(4) 0.15841(16) 0.0166(5) Uani 0.9472(10) 1 d PD A 1 

H6 H 0.3701 0.5558 0.2051 0.020 Uiso 0.9472(10) 1 calc PR A 1 

C7 C 0.18832(15) 0.8232(3) -0.00722(16) 0.0143(5) Uani 0.9472(10) 1 d PD A 1 

H7 H 0.1923 0.9368 0.0202 0.017 Uiso 0.9472(10) 1 calc PR A 1 

C8 C 0.12335(16) 0.8319(3) -0.08244(16) 0.0162(5) Uani 0.9472(10) 1 d PD A 1 

H8A H 0.1219 0.7223 -0.1112 0.019 Uiso 0.9472(10) 1 calc PR A 1 

H8B H 0.1330 0.9287 -0.1138 0.019 Uiso 0.9472(10) 1 calc PR A 1 

C9 C 0.04628(16) 0.8594(4) -0.06909(18) 0.0193(6) Uani 0.9472(10) 1 d PD A 1 

H9A H 0.0045 0.8555 -0.1185 0.023 Uiso 0.9472(10) 1 calc PR A 1 

H9B H 0.0452 0.9748 -0.0455 0.023 Uiso 0.9472(10) 1 calc PR A 1 

C10 C 0.03467(16) 0.7161(4) -0.01618(18) 0.0202(6) Uani 0.9472(10) 1 d PD A 1 

H10A H -0.0134 0.7379 -0.0038 0.024 Uiso 0.9472(10) 1 calc PR A 1 

H10B H 0.0298 0.6024 -0.0425 0.024 Uiso 0.9472(10) 1 calc PR A 1 

C11 C 0.10185(15) 0.7104(4) 0.05727(17) 0.0179(6) Uani 0.9472(10) 1 d PD A 1 

H11A H 0.1042 0.8212 0.0854 0.022 Uiso 0.9472(10) 1 calc PR A 1 

H11B H 0.0938 0.6150 0.0902 0.022 Uiso 0.9472(10) 1 calc PR A 1 

C12 C 0.23759(15) 0.6856(4) 0.11486(15) 0.0153(5) Uani 0.9472(10) 1 d PD A 1 

H12A H 0.2302 0.5895 0.1477 0.018 Uiso 0.9472(10) 1 calc PR A 1 

H12B H 0.2359 0.7967 0.1416 0.018 Uiso 0.9472(10) 1 calc PR A 1 

Br1B Br 0.5252(4) 1.0207(9) 0.2275(4) 0.0342(17) Uiso 0.0528(10) 1 d PD A 2 

Br2B Br 0.4083(10) 0.744(4) -0.0715(7) 0.030 Uiso 0.0528(10) 1 d PD A 2 

N1B N 0.2610(8) 0.705(4) -0.0240(10) 0.030 Uiso 0.0528(10) 1 d PD A 2 

H1NB H 0.2664 0.6459 -0.0584 0.045 Uiso 0.0528(10) 1 d P A 2 

N2B N 0.1754(7) 0.792(3) 0.0438(12) 0.030 Uiso 0.0528(10) 1 d PD A 2 

C1B C 0.4429(7) 0.926(5) 0.1477(9) 0.030 Uiso 0.0528(10) 1 d PD A 2 

C2B C 0.4548(11) 0.875(6) 0.0802(12) 0.030 Uiso 0.0528(10) 1 d PD A 2 

H2B H 0.5029 0.8939 0.0720 0.036 Uiso 0.0528(10) 1 calc PR A 2 

C3B C 0.3948(9) 0.796(4) 0.0246(9) 0.030 Uiso 0.0528(10) 1 d PD A 2 

C4B C 0.3231(8) 0.765(4) 0.0345(9) 0.030 Uiso 0.0528(10) 1 d PD A 2 

C5B C 0.3144(7) 0.812(4) 0.1052(8) 0.030 Uiso 0.0528(10) 1 d PD A 2 

C6B C 0.3723(8) 0.900(5) 0.1595(12) 0.030 Uiso 0.0528(10) 1 d PD A 2 

H6B H 0.3638 0.9432 0.2046 0.036 Uiso 0.0528(10) 1 calc PR A 2 

C7B C 0.1899(7) 0.661(3) -0.0085(10) 0.030 Uiso 0.0528(10) 1 d PD A 2 

H7B H 0.1949 0.5436 0.0158 0.036 Uiso 0.0528(10) 1 calc PR A 2 

C8B C 0.1251(9) 0.659(4) -0.0840(11) 0.030 Uiso 0.0528(10) 1 d PD A 2 

H8C H 0.1357 0.5684 -0.1178 0.036 Uiso 0.0528(10) 1 calc PR A 2 

H8D H 0.1227 0.7727 -0.1097 0.036 Uiso 0.0528(10) 1 calc PR A 2 

C9B C 0.0482(8) 0.621(5) -0.0717(14) 0.030 Uiso 0.0528(10) 1 d PD A 2 

H9C H 0.0482 0.5022 -0.0512 0.036 Uiso 0.0528(10) 1 calc PR A 2 

H9D H 0.0065 0.6295 -0.1210 0.036 Uiso 0.0528(10) 1 calc PR A 2 

C10B C 0.0352(7) 0.754(5) -0.0152(18) 0.030 Uiso 0.0528(10) 1 d PD A 2 

H10C H 0.0293 0.8716 -0.0384 0.036 Uiso 0.0528(10) 1 calc PR A 2 

H10D H -0.0127 0.7255 -0.0036 0.036 Uiso 0.0528(10) 1 calc PR A 2 

C11B C 0.1023(8) 0.754(5) 0.0585(15) 0.030 Uiso 0.0528(10) 1 d PD A 2 

H11C H 0.0932 0.8429 0.0938 0.036 Uiso 0.0528(10) 1 calc PR A 2 

H11D H 0.1056 0.6392 0.0835 0.036 Uiso 0.0528(10) 1 calc PR A 2 

C12B C 0.2377(8) 0.783(4) 0.1170(10) 0.030 Uiso 0.0528(10) 1 d PD A 2 

H12C H 0.2373 0.6673 0.1406 0.036 Uiso 0.0528(10) 1 calc PR A 2 

H12D H 0.2293 0.8722 0.1524 0.036 Uiso 0.0528(10) 1 calc PR A 2 

Br3 Br 0.47410(2) -0.02585(4) 0.27578(2) 0.02158(7) Uani 0.9472(10) 1 d PD A 1 

Br4 Br 0.17277(2) 0.23419(9) 0.15354(4) 0.01828(11) Uani 0.9472(10) 1 d PD A 1 

N3 N 0.22322(13) 0.2827(3) 0.00823(13) 0.0153(4) Uani 0.9472(10) 1 d PD A 1 

H3N H 0.1933(17) 0.358(4) 0.017(2) 0.023 Uiso 0.9472(10) 1 d PD A 1 

N4 N 0.29266(13) 0.1965(3) -0.07600(13) 0.0143(4) Uani 0.9472(10) 1 d PD A 1 

C13 C 0.39633(16) 0.0737(4) 0.19277(16) 0.0161(5) Uani 0.9472(10) 1 d PD A 1 

C14 C 0.32672(17) 0.1175(4) 0.20254(16) 0.0174(5) Uani 0.9472(10) 1 d PD A 1 

H14 H 0.3181 0.1003 0.2504 0.021 Uiso 0.9472(10) 1 calc PR A 1 

C15 C 0.26984(15) 0.1869(3) 0.14096(16) 0.0149(5) Uani 0.9472(10) 1 d PD A 1 

C16 C 0.28088(15) 0.2185(3) 0.07006(15) 0.0134(5) Uani 0.9472(10) 1 d PD A 1 

C17 C 0.35256(15) 0.1714(3) 0.06257(15) 0.0139(5) Uani 0.9472(10) 1 d PD A 1 

C18 C 0.40945(16) 0.0988(3) 0.12340(16) 0.0158(5) Uani 0.9472(10) 1 d PD A 1 

H18 H 0.4573 0.0665 0.1174 0.019 Uiso 0.9472(10) 1 calc PR A 1 

C19 C 0.24024(15) 0.3271(3) -0.06216(15) 0.0139(5) Uani 0.9472(10) 1 d PD A 1 

H19 H 0.2649 0.4445 -0.0567 0.017 Uiso 0.9472(10) 1 calc PR A 1 

C20 C 0.16499(16) 0.3308(4) -0.12682(15) 0.0157(5) Uani 0.9472(10) 1 d PD A 1 

H20A H 0.1310 0.4208 -0.1162 0.019 Uiso 0.9472(10) 1 calc PR A 1 

H20B H 0.1391 0.2168 -0.1301 0.019 Uiso 0.9472(10) 1 calc PR A 1 

C21 C 0.17862(18) 0.3705(4) -0.20293(17) 0.0199(6) Uani 0.9472(10) 1 d PD A 1 

H21A H 0.1296 0.3629 -0.2451 0.024 Uiso 0.9472(10) 1 calc PR A 1 

H21B H 0.1990 0.4900 -0.2021 0.024 Uiso 0.9472(10) 1 calc PR A 1 

C22 C 0.23547(19) 0.2405(5) -0.21603(16) 0.0212(6) Uani 0.9472(10) 1 d PD A 1 

H22A H 0.2481 0.2721 -0.2630 0.025 Uiso 0.9472(10) 1 calc PR A 1 

H22B H 0.2122 0.1230 -0.2235 0.025 Uiso 0.9472(10) 1 calc PR A 1 

C23 C 0.30877(17) 0.2380(4) -0.14789(16) 0.0188(6) Uani 0.9472(10) 1 d PD A 1 

H23A H 0.3445 0.1503 -0.1570 0.023 Uiso 0.9472(10) 1 calc PR A 1 

H23B H 0.3340 0.3532 -0.1430 0.023 Uiso 0.9472(10) 1 calc PR A 1 

C24 C 0.36535(16) 0.2041(4) -0.01324(15) 0.0153(5) Uani 0.9472(10) 1 d PD A 1 

H24A H 0.3891 0.3200 -0.0126 0.018 Uiso 0.9472(10) 1 calc PR A 1 

H24B H 0.4011 0.1156 -0.0217 0.018 Uiso 0.9472(10) 1 calc PR A 1 

Br3B Br 0.4726(4) 0.5140(8) 0.2830(4) 0.0337(17) Uiso 0.0528(10) 1 d PD A 2 

Br4B Br 0.1716(5) 0.258(3) 0.1543(9) 0.030 Uiso 0.0528(10) 1 d PD A 2 

N3B N 0.2262(10) 0.205(4) 0.0120(8) 0.030 Uiso 0.0528(10) 1 d PD A 2 

H3NB H 0.1906 0.1524 0.0188 0.045 Uiso 0.0528(10) 1 d P A 2 

N4B N 0.2949(13) 0.303(3) -0.0710(7) 0.030 Uiso 0.0528(10) 1 d PD A 2 

C13B C 0.3947(9) 0.423(5) 0.1977(7) 0.030 Uiso 0.0528(10) 1 d PD A 2 

C14B C 0.3262(11) 0.369(6) 0.2073(9) 0.030 Uiso 0.0528(10) 1 d PD A 2 

H14B H 0.3176 0.3796 0.2555 0.036 Uiso 0.0528(10) 1 calc PR A 2 

C15B C 0.2705(8) 0.298(4) 0.1451(8) 0.030 Uiso 0.0528(10) 1 d PD A 2 

C16B C 0.2830(9) 0.268(4) 0.0747(8) 0.030 Uiso 0.0528(10) 1 d PD A 2 

C17B C 0.3540(9) 0.323(4) 0.0678(8) 0.030 Uiso 0.0528(10) 1 d PD A 2 

C18B C 0.4087(14) 0.402(7) 0.1285(9) 0.030 Uiso 0.0528(10) 1 d PD A 2 

H18B H 0.4556 0.4417 0.1226 0.036 Uiso 0.0528(10) 1 calc PR A 2 

C19B C 0.2439(10) 0.167(3) -0.0587(7) 0.030 Uiso 0.0528(10) 1 d PD A 2 

H19B H 0.2700 0.0517 -0.0543 0.036 Uiso 0.0528(10) 1 calc PR A 2 

C20B C 0.1689(11) 0.162(5) -0.1236(9) 0.030 Uiso 0.0528(10) 1 d PD A 2 

H20C H 0.1416 0.2743 -0.1258 0.036 Uiso 0.0528(10) 1 calc PR A 2 

H20D H 0.1359 0.0687 -0.1140 0.036 Uiso 0.0528(10) 1 calc PR A 2 

C21B C 0.1832(14) 0.130(5) -0.1999(8) 0.030 Uiso 0.0528(10) 1 d PD A 2 

H21C H 0.2050 0.0120 -0.2002 0.036 Uiso 0.0528(10) 1 calc PR A 2 

H21D H 0.1342 0.1365 -0.2422 0.036 Uiso 0.0528(10) 1 calc PR A 2 

C22B C 0.2386(19) 0.265(6) -0.2115(7) 0.030 Uiso 0.0528(10) 1 d PD A 2 

H22C H 0.2139 0.3814 -0.2179 0.036 Uiso 0.0528(10) 1 calc PR A 2 

H22D H 0.2517 0.2385 -0.2586 0.036 Uiso 0.0528(10) 1 calc PR A 2 

C23B C 0.3117(16) 0.269(6) -0.1432(8) 0.030 Uiso 0.0528(10) 1 d PD A 2 

H23C H 0.3383 0.1554 -0.1394 0.036 Uiso 0.0528(10) 1 calc PR A 2 

H23D H 0.3465 0.3601 -0.1512 0.036 Uiso 0.0528(10) 1 calc PR A 2 

C24B C 0.3675(10) 0.297(5) -0.0081(8) 0.030 Uiso 0.0528(10) 1 d PD A 2 

H24C H 0.4023 0.3890 -0.0156 0.036 Uiso 0.0528(10) 1 calc PR A 2 

H24D H 0.3925 0.1831 -0.0084 0.036 Uiso 0.0528(10) 1 calc PR A 2 

  

loop_ 

 _atom_site_aniso_label 

 _atom_site_aniso_U_11 

 _atom_site_aniso_U_22 

 _atom_site_aniso_U_33 

 _atom_site_aniso_U_23 

 _atom_site_aniso_U_13 

 _atom_site_aniso_U_12 

Br1 0.01962(14) 0.03068(16) 0.01633(14) -0.00005(11) 0.00159(11) 0.00775(12) 

Br2 0.01995(16) 0.0227(3) 0.01701(14) 0.00210(16) 0.00974(12) 0.00145(16) 

N1 0.0144(11) 0.0168(11) 0.0159(11) 0.0037(9) 0.0060(9) -0.0002(9) 

N2 0.0146(11) 0.0148(10) 0.0168(11) 0.0013(9) 0.0068(9) -0.0005(8) 

C1 0.0164(13) 0.0172(12) 0.0159(13) -0.0021(10) 0.0016(10) 0.0022(10) 

C2 0.0150(12) 0.0181(12) 0.0181(13) -0.0035(10) 0.0065(10) 0.0007(10) 

C3 0.0179(12) 0.0144(11) 0.0137(12) -0.0022(9) 0.0066(10) -0.0026(10) 

C4 0.0140(11) 0.0131(12) 0.0149(12) -0.0029(9) 0.0048(9) -0.0019(9) 

C5 0.0158(12) 0.0137(11) 0.0138(12) -0.0031(9) 0.0053(10) -0.0017(9) 

C6 0.0190(13) 0.0163(12) 0.0140(12) -0.0029(10) 0.0045(10) -0.0008(10) 

C7 0.0133(12) 0.0111(11) 0.0191(13) -0.0007(9) 0.0062(10) -0.0016(9) 

C8 0.0172(13) 0.0136(11) 0.0171(13) 0.0014(10) 0.0043(10) -0.0001(10) 

C9 0.0144(13) 0.0177(12) 0.0249(15) 0.0019(11) 0.0047(11) 0.0014(10) 

C10 0.0146(13) 0.0222(15) 0.0242(14) -0.0015(12) 0.0068(11) -0.0024(11) 

C11 0.0144(12) 0.0219(14) 0.0188(13) -0.0008(11) 0.0070(10) -0.0015(10) 

C12 0.0156(12) 0.0183(12) 0.0129(12) 0.0010(10) 0.0058(10) -0.0012(10) 

Br3 0.01692(14) 0.02743(15) 0.01755(14) 0.00469(11) 0.00121(11) 0.00143(11) 

Br4 0.01614(13) 0.0220(3) 0.01925(13) 0.00157(15) 0.00920(10) 0.00203(12) 

N3 0.0158(11) 0.0175(11) 0.0138(10) 0.0006(9) 0.0062(8) 0.0043(9) 

N4 0.0153(10) 0.0143(10) 0.0140(10) -0.0026(8) 0.0057(8) -0.0006(8) 

C13 0.0147(12) 0.0160(12) 0.0157(13) 0.0016(10) 0.0021(10) -0.0009(10) 

C14 0.0216(14) 0.0175(12) 0.0138(12) -0.0014(10) 0.0067(11) -0.0020(10) 

C15 0.0146(12) 0.0151(12) 0.0158(12) -0.0004(10) 0.0060(10) -0.0005(10) 

C16 0.0148(12) 0.0109(11) 0.0153(12) -0.0028(9) 0.0059(9) -0.0010(9) 

C17 0.0144(12) 0.0128(11) 0.0150(12) -0.0023(9) 0.0052(10) -0.0019(9) 

C18 0.0147(12) 0.0148(12) 0.0179(13) -0.0025(10) 0.0048(10) -0.0023(10) 

C19 0.0166(12) 0.0116(11) 0.0143(12) -0.0006(9) 0.0060(10) -0.0005(9) 

C20 0.0173(13) 0.0143(11) 0.0152(12) -0.0004(10) 0.0043(10) 0.0003(10) 

C21 0.0234(14) 0.0210(13) 0.0151(13) 0.0034(11) 0.0059(11) 0.0038(11) 

C22 0.0262(15) 0.0247(16) 0.0140(12) -0.0007(11) 0.0079(11) 0.0002(12) 

C23 0.0212(13) 0.0229(15) 0.0140(12) -0.0003(11) 0.0081(10) 0.0009(11) 

C24 0.0152(12) 0.0170(12) 0.0144(12) -0.0012(10) 0.0057(10) -0.0003(10) 

  

_geom_special_details 

; 

 All esds (except the esd in the dihedral angle between two l.s. planes) 

 are estimated using the full covariance matrix.  The cell esds are taken 

 into account individually in the estimation of esds in distances, angles 

 and torsion angles; correlations between esds in cell parameters are only 

 used when they are defined by crystal symmetry.  An approximate (isotropic) 

 treatment of cell esds is used for estimating esds involving l.s. planes. 

; 

  

loop_ 

 _geom_bond_atom_site_label_1 

 _geom_bond_atom_site_label_2 

 _geom_bond_distance 

 _geom_bond_site_symmetry_2 

 _geom_bond_publ_flag 

Br1 C1 1.894(3) . ? 

Br2 C3 1.900(3) . ? 

N1 C4 1.378(3) . ? 

N1 C7 1.458(3) . ? 

N1 H1N 0.845(10) . ? 

N2 C7 1.470(3) . ? 

N2 C12 1.471(4) . ? 

N2 C11 1.477(3) . ? 

C1 C2 1.381(4) . ? 

C1 C6 1.391(4) . ? 

C2 C3 1.390(4) . ? 

C2 H2 0.9500 . ? 

C3 C4 1.403(4) . ? 

C4 C5 1.407(4) . ? 

C5 C6 1.386(4) . ? 

C5 C12 1.503(4) . ? 

C6 H6 0.9500 . ? 

C7 C8 1.521(4) . ? 

C7 H7 1.0000 . ? 

C8 C9 1.522(4) . ? 

C8 H8A 0.9900 . ? 

C8 H8B 0.9900 . ? 

C9 C10 1.528(4) . ? 

C9 H9A 0.9900 . ? 

C9 H9B 0.9900 . ? 

C10 C11 1.520(4) . ? 

C10 H10A 0.9900 . ? 

C10 H10B 0.9900 . ? 

C11 H11A 0.9900 . ? 

C11 H11B 0.9900 . ? 

C12 H12A 0.9900 . ? 

C12 H12B 0.9900 . ? 

Br1B C1B 1.894(3) . ? 

Br2B C3B 1.901(3) . ? 

N1B C4B 1.379(4) . ? 

N1B C7B 1.458(4) . ? 

N1B H1NB 0.811(16) . ? 

N2B C7B 1.471(3) . ? 

N2B C12B 1.471(4) . ? 

N2B C11B 1.476(4) . ? 

C1B C2B 1.381(4) . ? 

C1B C6B 1.391(4) . ? 

C2B C3B 1.390(4) . ? 

C2B H2B 0.9500 . ? 

C3B C4B 1.404(4) . ? 

C4B C5B 1.408(4) . ? 

C5B C6B 1.387(4) . ? 

C5B C12B 1.503(4) . ? 

C6B H6B 0.9500 . ? 

C7B C8B 1.521(4) . ? 

C7B H7B 1.0000 . ? 

C8B C9B 1.522(4) . ? 

C8B H8C 0.9900 . ? 

C8B H8D 0.9900 . ? 

C9B C10B 1.528(4) . ? 

C9B H9C 0.9900 . ? 

C9B H9D 0.9900 . ? 

C10B C11B 1.520(4) . ? 

C10B H10C 0.9900 . ? 

C10B H10D 0.9900 . ? 

C11B H11C 0.9900 . ? 

C11B H11D 0.9900 . ? 

C12B H12C 0.9900 . ? 

C12B H12D 0.9900 . ? 

Br3 C13 1.897(3) . ? 

Br4 C15 1.899(3) . ? 

N3 C16 1.381(3) . ? 

N3 C19 1.463(3) . ? 

N3 H3N 0.848(10) . ? 

N4 C19 1.465(3) . ? 

N4 C24 1.469(4) . ? 

N4 C23 1.476(3) . ? 

C13 C18 1.383(4) . ? 

C13 C14 1.384(4) . ? 

C14 C15 1.386(4) . ? 

C14 H14 0.9500 . ? 

C15 C16 1.401(4) . ? 

C16 C17 1.410(4) . ? 

C17 C18 1.388(4) . ? 

C17 C24 1.505(4) . ? 

C18 H18 0.9500 . ? 

C19 C20 1.517(4) . ? 

C19 H19 1.0000 . ? 

C20 C21 1.526(4) . ? 

C20 H20A 0.9900 . ? 

C20 H20B 0.9900 . ? 

C21 C22 1.516(4) . ? 

C21 H21A 0.9900 . ? 

C21 H21B 0.9900 . ? 

C22 C23 1.527(4) . ? 

C22 H22A 0.9900 . ? 

C22 H22B 0.9900 . ? 

C23 H23A 0.9900 . ? 

C23 H23B 0.9900 . ? 

C24 H24A 0.9900 . ? 

C24 H24B 0.9900 . ? 

Br3B C13B 1.897(3) . ? 

Br4B C15B 1.900(3) . ? 

N3B C16B 1.381(4) . ? 

N3B C19B 1.463(4) . ? 

N3B H3NB 0.809(16) . ? 

N4B C19B 1.465(3) . ? 

N4B C24B 1.469(4) . ? 

N4B C23B 1.476(4) . ? 

C13B C18B 1.383(4) . ? 

C13B C14B 1.385(4) . ? 

C14B C15B 1.386(4) . ? 

C14B H14B 0.9500 . ? 

C15B C16B 1.401(4) . ? 

C16B C17B 1.411(4) . ? 

C17B C18B 1.388(4) . ? 

C17B C24B 1.505(4) . ? 

C18B H18B 0.9500 . ? 

C19B C20B 1.517(4) . ? 

C19B H19B 1.0000 . ? 

C20B C21B 1.526(4) . ? 

C20B H20C 0.9900 . ? 

C20B H20D 0.9900 . ? 

C21B C22B 1.516(5) . ? 

C21B H21C 0.9900 . ? 

C21B H21D 0.9900 . ? 

C22B C23B 1.527(4) . ? 

C22B H22C 0.9900 . ? 

C22B H22D 0.9900 . ? 

C23B H23C 0.9900 . ? 

C23B H23D 0.9900 . ? 

C24B H24C 0.9900 . ? 

C24B H24D 0.9900 . ? 

  

loop_ 

 _geom_angle_atom_site_label_1 

 _geom_angle_atom_site_label_2 

 _geom_angle_atom_site_label_3 

 _geom_angle 

 _geom_angle_site_symmetry_1 

 _geom_angle_site_symmetry_3 

 _geom_angle_publ_flag 

C4 N1 C7 119.8(2) . . ? 

C4 N1 H1N 121(3) . . ? 

C7 N1 H1N 109(3) . . ? 

C7 N2 C12 108.7(2) . . ? 

C7 N2 C11 110.1(2) . . ? 

C12 N2 C11 108.4(2) . . ? 

C2 C1 C6 121.0(3) . . ? 

C2 C1 Br1 119.7(2) . . ? 

C6 C1 Br1 119.3(2) . . ? 

C1 C2 C3 118.4(3) . . ? 

C1 C2 H2 120.8 . . ? 

C3 C2 H2 120.8 . . ? 

C2 C3 C4 122.6(2) . . ? 

C2 C3 Br2 118.4(2) . . ? 

C4 C3 Br2 118.9(2) . . ? 

N1 C4 C3 122.4(2) . . ? 

N1 C4 C5 120.4(2) . . ? 

C3 C4 C5 117.1(2) . . ? 

C6 C5 C4 120.8(2) . . ? 

C6 C5 C12 120.9(2) . . ? 

C4 C5 C12 118.3(2) . . ? 

C5 C6 C1 120.0(3) . . ? 

C5 C6 H6 120.0 . . ? 

C1 C6 H6 120.0 . . ? 

N1 C7 N2 108.8(2) . . ? 

N1 C7 C8 108.5(2) . . ? 

N2 C7 C8 111.0(2) . . ? 

N1 C7 H7 109.5 . . ? 

N2 C7 H7 109.5 . . ? 

C8 C7 H7 109.5 . . ? 

C7 C8 C9 111.3(2) . . ? 

C7 C8 H8A 109.4 . . ? 

C9 C8 H8A 109.4 . . ? 

C7 C8 H8B 109.4 . . ? 

C9 C8 H8B 109.4 . . ? 

H8A C8 H8B 108.0 . . ? 

C8 C9 C10 108.8(2) . . ? 

C8 C9 H9A 109.9 . . ? 

C10 C9 H9A 109.9 . . ? 

C8 C9 H9B 109.9 . . ? 

C10 C9 H9B 109.9 . . ? 

H9A C9 H9B 108.3 . . ? 

C11 C10 C9 110.6(2) . . ? 

C11 C10 H10A 109.5 . . ? 

C9 C10 H10A 109.5 . . ? 

C11 C10 H10B 109.5 . . ? 

C9 C10 H10B 109.5 . . ? 

H10A C10 H10B 108.1 . . ? 

N2 C11 C10 111.6(2) . . ? 

N2 C11 H11A 109.3 . . ? 

C10 C11 H11A 109.3 . . ? 

N2 C11 H11B 109.3 . . ? 

C10 C11 H11B 109.3 . . ? 

H11A C11 H11B 108.0 . . ? 

N2 C12 C5 111.0(2) . . ? 

N2 C12 H12A 109.4 . . ? 

C5 C12 H12A 109.4 . . ? 

N2 C12 H12B 109.4 . . ? 

C5 C12 H12B 109.4 . . ? 

H12A C12 H12B 108.0 . . ? 

C4B N1B C7B 119.8(3) . . ? 

C4B N1B H1NB 121.5(12) . . ? 

C7B N1B H1NB 110.8(14) . . ? 

C7B N2B C12B 108.7(3) . . ? 

C7B N2B C11B 110.1(3) . . ? 

C12B N2B C11B 108.4(3) . . ? 

C2B C1B C6B 120.9(3) . . ? 

C2B C1B Br1B 119.7(3) . . ? 

C6B C1B Br1B 119.3(3) . . ? 

C1B C2B C3B 118.4(3) . . ? 

C1B C2B H2B 120.8 . . ? 

C3B C2B H2B 120.8 . . ? 

C2B C3B C4B 122.6(3) . . ? 

C2B C3B Br2B 118.4(3) . . ? 

C4B C3B Br2B 118.9(3) . . ? 

N1B C4B C3B 122.4(3) . . ? 

N1B C4B C5B 120.3(3) . . ? 

C3B C4B C5B 117.1(3) . . ? 

C6B C5B C4B 120.7(3) . . ? 

C6B C5B C12B 120.8(3) . . ? 

C4B C5B C12B 118.2(3) . . ? 

C5B C6B C1B 119.9(3) . . ? 

C5B C6B H6B 120.0 . . ? 

C1B C6B H6B 120.0 . . ? 

N1B C7B N2B 108.8(3) . . ? 

N1B C7B C8B 108.5(3) . . ? 

N2B C7B C8B 110.9(3) . . ? 

N1B C7B H7B 109.5 . . ? 

N2B C7B H7B 109.5 . . ? 

C8B C7B H7B 109.5 . . ? 

C7B C8B C9B 111.3(3) . . ? 

C7B C8B H8C 109.4 . . ? 

C9B C8B H8C 109.4 . . ? 

C7B C8B H8D 109.4 . . ? 

C9B C8B H8D 109.4 . . ? 

H8C C8B H8D 108.0 . . ? 

C8B C9B C10B 108.8(3) . . ? 

C8B C9B H9C 109.9 . . ? 

C10B C9B H9C 109.9 . . ? 

C8B C9B H9D 109.9 . . ? 

C10B C9B H9D 109.9 . . ? 

H9C C9B H9D 108.3 . . ? 

C11B C10B C9B 110.6(3) . . ? 

C11B C10B H10C 109.5 . . ? 

C9B C10B H10C 109.5 . . ? 

C11B C10B H10D 109.5 . . ? 

C9B C10B H10D 109.5 . . ? 

H10C C10B H10D 108.1 . . ? 

N2B C11B C10B 111.5(3) . . ? 

N2B C11B H11C 109.3 . . ? 

C10B C11B H11C 109.3 . . ? 

N2B C11B H11D 109.3 . . ? 

C10B C11B H11D 109.3 . . ? 

H11C C11B H11D 108.0 . . ? 

N2B C12B C5B 110.9(3) . . ? 

N2B C12B H12C 109.5 . . ? 

C5B C12B H12C 109.5 . . ? 

N2B C12B H12D 109.5 . . ? 

C5B C12B H12D 109.5 . . ? 

H12C C12B H12D 108.0 . . ? 

C16 N3 C19 119.5(2) . . ? 

C16 N3 H3N 117(3) . . ? 

C19 N3 H3N 110(3) . . ? 

C19 N4 C24 108.7(2) . . ? 

C19 N4 C23 109.4(2) . . ? 

C24 N4 C23 108.1(2) . . ? 

C18 C13 C14 121.1(3) . . ? 

C18 C13 Br3 119.7(2) . . ? 

C14 C13 Br3 119.1(2) . . ? 

C13 C14 C15 118.5(3) . . ? 

C13 C14 H14 120.7 . . ? 

C15 C14 H14 120.7 . . ? 

C14 C15 C16 122.5(2) . . ? 

C14 C15 Br4 118.0(2) . . ? 

C16 C15 Br4 119.4(2) . . ? 

N3 C16 C15 122.2(2) . . ? 

N3 C16 C17 120.6(2) . . ? 

C15 C16 C17 117.0(2) . . ? 

C18 C17 C16 121.0(2) . . ? 

C18 C17 C24 121.3(2) . . ? 

C16 C17 C24 117.7(2) . . ? 

C13 C18 C17 119.8(3) . . ? 

C13 C18 H18 120.1 . . ? 

C17 C18 H18 120.1 . . ? 

N3 C19 N4 109.0(2) . . ? 

N3 C19 C20 107.8(2) . . ? 

N4 C19 C20 111.3(2) . . ? 

N3 C19 H19 109.6 . . ? 

N4 C19 H19 109.6 . . ? 

C20 C19 H19 109.6 . . ? 

C19 C20 C21 110.8(2) . . ? 

C19 C20 H20A 109.5 . . ? 

C21 C20 H20A 109.5 . . ? 

C19 C20 H20B 109.5 . . ? 

C21 C20 H20B 109.5 . . ? 

H20A C20 H20B 108.1 . . ? 

C22 C21 C20 109.3(2) . . ? 

C22 C21 H21A 109.8 . . ? 

C20 C21 H21A 109.8 . . ? 

C22 C21 H21B 109.8 . . ? 

C20 C21 H21B 109.8 . . ? 

H21A C21 H21B 108.3 . . ? 

C21 C22 C23 110.6(2) . . ? 

C21 C22 H22A 109.5 . . ? 

C23 C22 H22A 109.5 . . ? 

C21 C22 H22B 109.5 . . ? 

C23 C22 H22B 109.5 . . ? 

H22A C22 H22B 108.1 . . ? 

N4 C23 C22 111.6(2) . . ? 

N4 C23 H23A 109.3 . . ? 

C22 C23 H23A 109.3 . . ? 

N4 C23 H23B 109.3 . . ? 

C22 C23 H23B 109.3 . . ? 

H23A C23 H23B 108.0 . . ? 

N4 C24 C17 110.9(2) . . ? 

N4 C24 H24A 109.5 . . ? 

C17 C24 H24A 109.5 . . ? 

N4 C24 H24B 109.5 . . ? 

C17 C24 H24B 109.5 . . ? 

H24A C24 H24B 108.0 . . ? 

C16B N3B C19B 119.5(3) . . ? 

C16B N3B H3NB 118.8(11) . . ? 

C19B N3B H3NB 116.9(13) . . ? 

C19B N4B C24B 108.7(3) . . ? 

C19B N4B C23B 109.4(3) . . ? 

C24B N4B C23B 108.1(3) . . ? 

C18B C13B C14B 121.1(3) . . ? 

C18B C13B Br3B 119.7(3) . . ? 

C14B C13B Br3B 119.1(3) . . ? 

C13B C14B C15B 118.5(3) . . ? 

C13B C14B H14B 120.7 . . ? 

C15B C14B H14B 120.7 . . ? 

C14B C15B C16B 122.5(3) . . ? 

C14B C15B Br4B 118.0(3) . . ? 

C16B C15B Br4B 119.4(3) . . ? 

N3B C16B C15B 122.1(3) . . ? 

N3B C16B C17B 120.6(3) . . ? 

C15B C16B C17B 117.0(3) . . ? 

C18B C17B C16B 121.0(3) . . ? 

C18B C17B C24B 121.3(3) . . ? 

C16B C17B C24B 117.7(3) . . ? 

C13B C18B C17B 119.8(3) . . ? 

C13B C18B H18B 120.1 . . ? 

C17B C18B H18B 120.1 . . ? 

N3B C19B N4B 109.0(3) . . ? 

N3B C19B C20B 107.8(3) . . ? 

N4B C19B C20B 111.3(3) . . ? 

N3B C19B H19B 109.6 . . ? 

N4B C19B H19B 109.6 . . ? 

C20B C19B H19B 109.6 . . ? 

C19B C20B C21B 110.8(3) . . ? 

C19B C20B H20C 109.5 . . ? 

C21B C20B H20C 109.5 . . ? 

C19B C20B H20D 109.5 . . ? 

C21B C20B H20D 109.5 . . ? 

H20C C20B H20D 108.1 . . ? 

C22B C21B C20B 109.3(3) . . ? 

C22B C21B H21C 109.8 . . ? 

C20B C21B H21C 109.8 . . ? 

C22B C21B H21D 109.8 . . ? 

C20B C21B H21D 109.8 . . ? 

H21C C21B H21D 108.3 . . ? 

C21B C22B C23B 110.6(3) . . ? 

C21B C22B H22C 109.5 . . ? 

C23B C22B H22C 109.5 . . ? 

C21B C22B H22D 109.5 . . ? 

C23B C22B H22D 109.5 . . ? 

H22C C22B H22D 108.1 . . ? 

N4B C23B C22B 111.6(3) . . ? 

N4B C23B H23C 109.3 . . ? 

C22B C23B H23C 109.3 . . ? 

N4B C23B H23D 109.3 . . ? 

C22B C23B H23D 109.3 . . ? 

H23C C23B H23D 108.0 . . ? 

N4B C24B C17B 110.9(3) . . ? 

N4B C24B H24C 109.5 . . ? 

C17B C24B H24C 109.5 . . ? 

N4B C24B H24D 109.5 . . ? 

C17B C24B H24D 109.5 . . ? 

H24C C24B H24D 108.0 . . ? 

  

loop_ 

 _geom_torsion_atom_site_label_1 

 _geom_torsion_atom_site_label_2 

 _geom_torsion_atom_site_label_3 

 _geom_torsion_atom_site_label_4 

 _geom_torsion 

 _geom_torsion_site_symmetry_1 

 _geom_torsion_site_symmetry_2 

 _geom_torsion_site_symmetry_3 

 _geom_torsion_site_symmetry_4 

 _geom_torsion_publ_flag 

C6 C1 C2 C3 0.5(4) . . . . ? 

Br1 C1 C2 C3 179.6(2) . . . . ? 

C1 C2 C3 C4 1.8(4) . . . . ? 

C1 C2 C3 Br2 -175.0(2) . . . . ? 

C7 N1 C4 C3 -174.8(2) . . . . ? 

C7 N1 C4 C5 9.6(4) . . . . ? 

C2 C3 C4 N1 -178.5(3) . . . . ? 

Br2 C3 C4 N1 -1.8(4) . . . . ? 

C2 C3 C4 C5 -2.7(4) . . . . ? 

Br2 C3 C4 C5 174.0(2) . . . . ? 

N1 C4 C5 C6 177.4(2) . . . . ? 

C3 C4 C5 C6 1.5(4) . . . . ? 

N1 C4 C5 C12 -2.7(4) . . . . ? 

C3 C4 C5 C12 -178.6(2) . . . . ? 

C4 C5 C6 C1 0.7(4) . . . . ? 

C12 C5 C6 C1 -179.2(3) . . . . ? 

C2 C1 C6 C5 -1.7(4) . . . . ? 

Br1 C1 C6 C5 179.2(2) . . . . ? 

C4 N1 C7 N2 -39.9(3) . . . . ? 

C4 N1 C7 C8 -160.7(2) . . . . ? 

C12 N2 C7 N1 63.5(3) . . . . ? 

C11 N2 C7 N1 -177.9(2) . . . . ? 

C12 N2 C7 C8 -177.2(2) . . . . ? 

C11 N2 C7 C8 -58.6(3) . . . . ? 

N1 C7 C8 C9 177.4(2) . . . . ? 

N2 C7 C8 C9 58.0(3) . . . . ? 

C7 C8 C9 C10 -55.2(3) . . . . ? 

C8 C9 C10 C11 54.8(3) . . . . ? 

C7 N2 C11 C10 59.0(3) . . . . ? 

C12 N2 C11 C10 177.8(2) . . . . ? 

C9 C10 C11 N2 -57.7(3) . . . . ? 

C7 N2 C12 C5 -57.5(3) . . . . ? 

C11 N2 C12 C5 -177.2(2) . . . . ? 

C6 C5 C12 N2 -152.9(2) . . . . ? 

C4 C5 C12 N2 27.2(3) . . . . ? 

C6B C1B C2B C3B -1(4) . . . . ? 

Br1B C1B C2B C3B 176(3) . . . . ? 

C1B C2B C3B C4B 0(5) . . . . ? 

C1B C2B C3B Br2B 175(3) . . . . ? 

C7B N1B C4B C3B 174.7(18) . . . . ? 

C7B N1B C4B C5B -11(2) . . . . ? 

C2B C3B C4B N1B 172(3) . . . . ? 

Br2B C3B C4B N1B -3(3) . . . . ? 

C2B C3B C4B C5B -2(3) . . . . ? 

Br2B C3B C4B C5B -177(2) . . . . ? 

N1B C4B C5B C6B -169(3) . . . . ? 

C3B C4B C5B C6B 6(3) . . . . ? 

N1B C4B C5B C12B 5(2) . . . . ? 

C3B C4B C5B C12B 179.2(17) . . . . ? 

C4B C5B C6B C1B -7(3) . . . . ? 

C12B C5B C6B C1B 180(2) . . . . ? 

C2B C1B C6B C5B 4(4) . . . . ? 

Br1B C1B C6B C5B -172(3) . . . . ? 

C4B N1B C7B N2B 40.6(12) . . . . ? 

C4B N1B C7B C8B 161.4(12) . . . . ? 

C12B N2B C7B N1B -63.4(4) . . . . ? 

C11B N2B C7B N1B 178.0(4) . . . . ? 

C12B N2B C7B C8B 177.3(4) . . . . ? 

C11B N2B C7B C8B 58.7(4) . . . . ? 

N1B C7B C8B C9B -177.4(4) . . . . ? 

N2B C7B C8B C9B -58.0(4) . . . . ? 

C7B C8B C9B C10B 55.2(5) . . . . ? 

C8B C9B C10B C11B -54.7(5) . . . . ? 

C7B N2B C11B C10B -59.0(4) . . . . ? 

C12B N2B C11B C10B -177.8(4) . . . . ? 

C9B C10B C11B N2B 57.7(5) . . . . ? 

C7B N2B C12B C5B 57.8(5) . . . . ? 

C11B N2B C12B C5B 177.5(5) . . . . ? 

C6B C5B C12B N2B 145(2) . . . . ? 

C4B C5B C12B N2B -28.7(13) . . . . ? 

C18 C13 C14 C15 0.2(4) . . . . ? 

Br3 C13 C14 C15 -178.7(2) . . . . ? 

C13 C14 C15 C16 -1.7(4) . . . . ? 

C13 C14 C15 Br4 176.5(2) . . . . ? 

C19 N3 C16 C15 174.7(2) . . . . ? 

C19 N3 C16 C17 -9.4(4) . . . . ? 

C14 C15 C16 N3 178.0(3) . . . . ? 

Br4 C15 C16 N3 -0.3(4) . . . . ? 

C14 C15 C16 C17 1.9(4) . . . . ? 

Br4 C15 C16 C17 -176.33(19) . . . . ? 

N3 C16 C17 C18 -176.8(2) . . . . ? 

C15 C16 C17 C18 -0.7(4) . . . . ? 

N3 C16 C17 C24 3.7(4) . . . . ? 

C15 C16 C17 C24 179.9(2) . . . . ? 

C14 C13 C18 C17 0.9(4) . . . . ? 

Br3 C13 C18 C17 179.9(2) . . . . ? 

C16 C17 C18 C13 -0.7(4) . . . . ? 

C24 C17 C18 C13 178.7(2) . . . . ? 

C16 N3 C19 N4 39.2(3) . . . . ? 

C16 N3 C19 C20 160.1(2) . . . . ? 

C24 N4 C19 N3 -63.5(3) . . . . ? 

C23 N4 C19 N3 178.7(2) . . . . ? 

C24 N4 C19 C20 177.7(2) . . . . ? 

C23 N4 C19 C20 59.9(3) . . . . ? 

N3 C19 C20 C21 -178.1(2) . . . . ? 

N4 C19 C20 C21 -58.6(3) . . . . ? 

C19 C20 C21 C22 54.8(3) . . . . ? 

C20 C21 C22 C23 -54.1(3) . . . . ? 

C19 N4 C23 C22 -59.5(3) . . . . ? 

C24 N4 C23 C22 -177.6(2) . . . . ? 

C21 C22 C23 N4 57.5(3) . . . . ? 

C19 N4 C24 C17 58.7(3) . . . . ? 

C23 N4 C24 C17 177.3(2) . . . . ? 

C18 C17 C24 N4 151.8(2) . . . . ? 

C16 C17 C24 N4 -28.7(3) . . . . ? 

C18B C13B C14B C15B -2(4) . . . . ? 

Br3B C13B C14B C15B -178(2) . . . . ? 

C13B C14B C15B C16B 5(3) . . . . ? 

C13B C14B C15B Br4B -170(3) . . . . ? 

C19B N3B C16B C15B -177(2) . . . . ? 

C19B N3B C16B C17B 10(3) . . . . ? 

C14B C15B C16B N3B -177(2) . . . . ? 

Br4B C15B C16B N3B -2(3) . . . . ? 

C14B C15B C16B C17B -4(3) . . . . ? 

Br4B C15B C16B C17B 171(2) . . . . ? 

N3B C16B C17B C18B 174(4) . . . . ? 

C15B C16B C17B C18B 0(4) . . . . ? 

N3B C16B C17B C24B -5(3) . . . . ? 

C15B C16B C17B C24B -178(2) . . . . ? 

C14B C13B C18B C17B -1(5) . . . . ? 

Br3B C13B C18B C17B 175(4) . . . . ? 

C16B C17B C18B C13B 2(5) . . . . ? 

C24B C17B C18B C13B -180(3) . . . . ? 

C16B N3B C19B N4B -39.4(14) . . . . ? 

C16B N3B C19B C20B -160.3(13) . . . . ? 

C24B N4B C19B N3B 63.5(4) . . . . ? 

C23B N4B C19B N3B -178.7(4) . . . . ? 

C24B N4B C19B C20B -177.8(4) . . . . ? 

C23B N4B C19B C20B -60.0(4) . . . . ? 

N3B C19B C20B C21B 178.1(4) . . . . ? 

N4B C19B C20B C21B 58.6(4) . . . . ? 

C19B C20B C21B C22B -54.8(5) . . . . ? 

C20B C21B C22B C23B 54.1(5) . . . . ? 

C19B N4B C23B C22B 59.5(5) . . . . ? 

C24B N4B C23B C22B 177.7(4) . . . . ? 

C21B C22B C23B N4B -57.5(5) . . . . ? 

C19B N4B C24B C17B -58.8(5) . . . . ? 

C23B N4B C24B C17B -177.4(5) . . . . ? 

C18B C17B C24B N4B -149(4) . . . . ? 

C16B C17B C24B N4B 29.2(15) . . . . ? 

  

loop_ 

 _geom_hbond_atom_site_label_D 

 _geom_hbond_atom_site_label_H 

 _geom_hbond_atom_site_label_A 

 _geom_hbond_distance_DH 

 _geom_hbond_distance_HA 

 _geom_hbond_distance_DA 

 _geom_hbond_angle_DHA 

 _geom_hbond_site_symmetry_A 

N3 H3N N2  0.848(10) 2.57(2) 3.307(3) 145(3) . 

N1 H1N N4  0.845(10) 2.65(2) 3.385(3) 146(3) 1_565 

N3 H3N Br4  0.848(10) 2.82(4) 3.109(2) 102(3) . 

N1 H1N Br2  0.845(10) 2.83(4) 3.101(2) 101(3) . 

C12 H12A Br4  0.99 2.94 3.805(3) 146.5 . 

C24 H24B Br2  0.99 2.94 3.769(3) 141.6 1_545 

C20 H20A Br3  0.99 3.05 3.716(3) 125.4 4_565 

C8 H8B Br1  0.99 3.06 3.711(3) 124.3 4_575 

  

_diffrn_measured_fraction_theta_max    0.990 

_diffrn_reflns_theta_full              30.56 

_diffrn_measured_fraction_theta_full   0.990 

_refine_diff_density_max    0.944 

_refine_diff_density_min   -0.487 

_refine_diff_density_rms    0.098 
